# Supplementary material for: Viral pre-challenge increases central nervous system inflammation after intracranial interleukin-1β injection
Source: PubMed Central journal article supplement (PMC4201684; doi:10.1186/s12974-014-0178-3), 2014-10-17
Supplement: 12974_2014_178_MOESM1_ESM.pdf [file 12974_2014_178_MOESM1_ESM.pdf]

| Marker                     | Accession Number | Forward Primer        | Reverse Primer         | Probe          | Amplicon Size |
|----------------------------|------------------|-----------------------|------------------------|----------------|---------------|
| IL-1 $\beta$               | NM031512.1       | TGTGATGAAAGACGGCACA   | CTTCTCTTTGGGTATTGTTTGG | Roche probe 78 | 70nt          |
| CXCL-1                     | NM030845.1       | CACACTCCAACAGAGCACCA  | TGACAGCGCAGCTCATTG     | Roche probe 83 | 120nt         |
| CXCL-10                    | NM139089         | AAAGAGGGGAGCAGGAAGAA  | CTCTGACTTCAACCAGCATACG | Roche probe 41 | 66nt          |
| CCL-2                      | NM031530         | AGCATCCACGTGCTGTCTC   | GATCATCTTGCCAGTGAATGAG | Roche probe 62 | 78nt          |
| CCL-3<br>(MIP-1 $\alpha$ ) | NM013025.2       | CTGGAACGAAGTCTTCTCAGC | GAATTTGCCGTCCATAGGAG   | Roche probe 40 | 77nt          |
| CCL-4<br>(MIP-1 $\beta$ )  | NM053858.1       | GAGACCAGCAGCCTTTGC    | CACAGATTTGCCTGCCTTTT   | Roche probe 20 | 67nt          |
