# Supplementary material for: Viral pre-challenge increases central nervous system inflammation after intracranial interleukin-1β injection
Source: PubMed Central journal article supplement (PMC4201684; doi:10.1186/s12974-014-0178-3), 2014-10-17

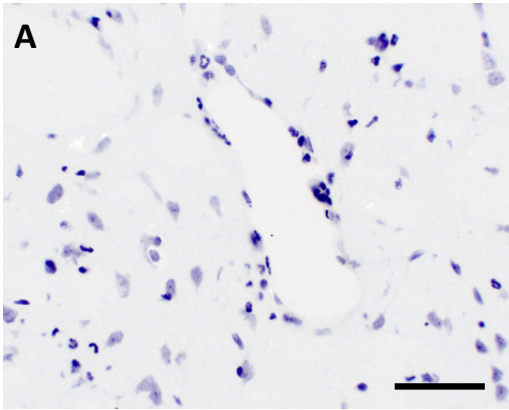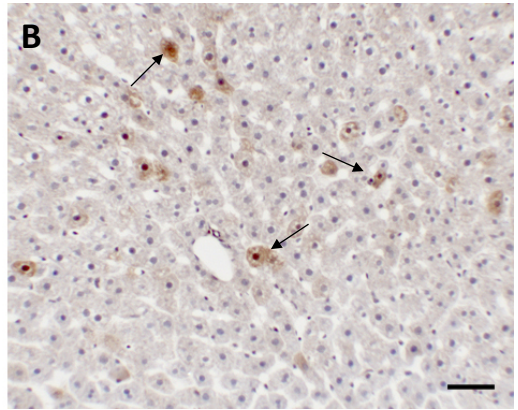

Supplement: 12974_2014_178_MOESM4_ESM.pdf [file 12974_2014_178_MOESM4_ESM.pdf]
