# Supplementary material for: Viral pre-challenge increases central nervous system inflammation after intracranial interleukin-1β injection
Source: Springer Nature journal article supplement (doi:10.1186/s12974-014-0178-3), 2014-10-16

### A CCL-3

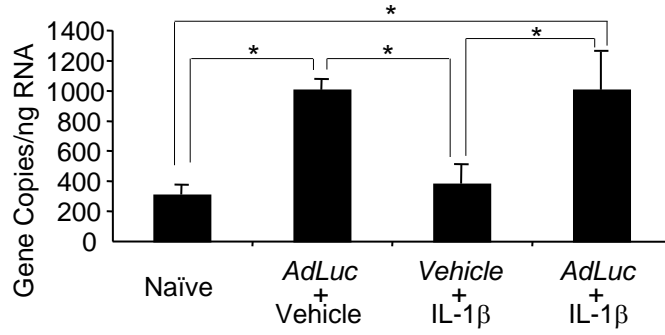

### B CCL-4

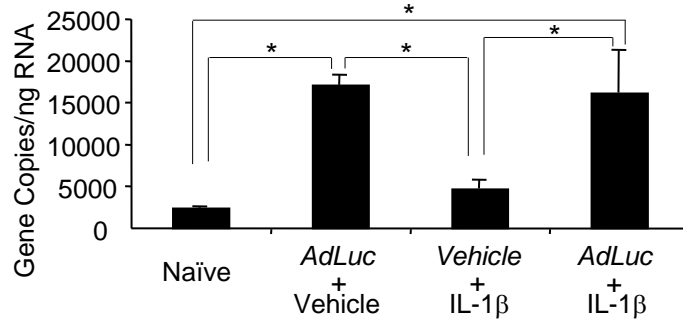

Supplement: MOESM5 [file 9768408]
